# Supplementary material for: Chrysophanol Regulates Cell Death, Metastasis, and Reactive Oxygen Species Production in Oral Cancer Cell Lines
Source: Hindawi journal article supplement (doi:10.1155/2020/5867064), 2020-01-01
Supplement: f1 [file 5867064.f1.pdf]

## 1 Supplementary figure 1

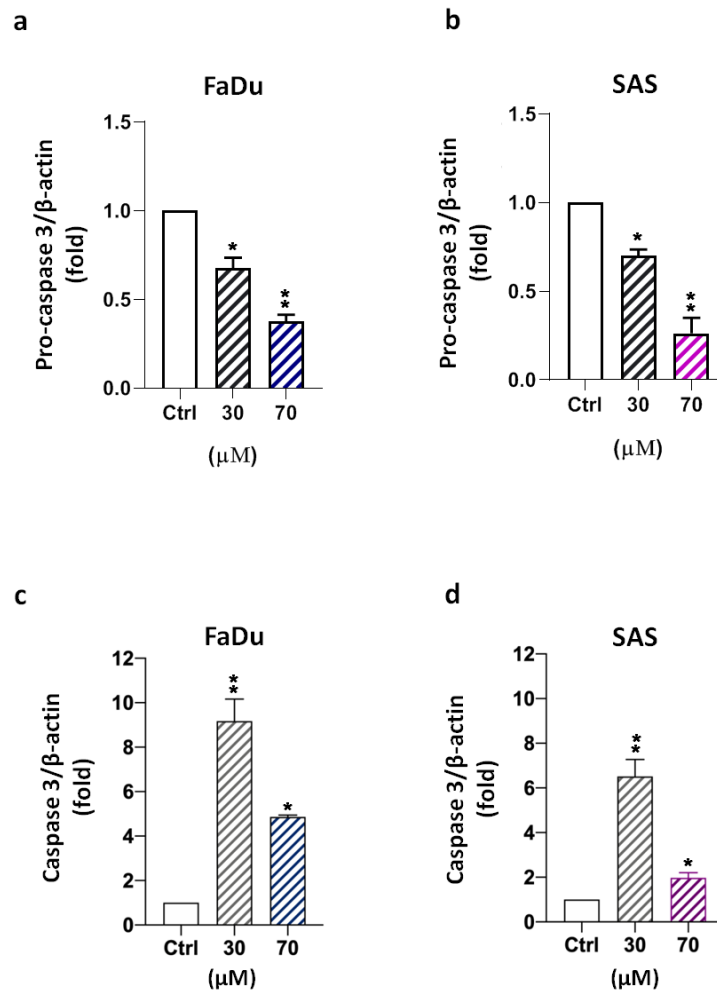

2  
3 **Supplementary Fig. 1** Quantification of Western blots represented in Figure 2C. Triplicates  
4 of the experiments shown in Figure 2C were quantified using densitometry (GraphPad  
5 Prism8 software). **Densitometric analysis of all samples normalized against the level of total**  
6 **protein. The relative expression of pro-caspase 3 and β-actin are presented as pro-caspase**  
7 **3/β-actin (fold) in (a) FaDu and (b) SAS, and caspase 3 and β-actin are presented as**  
8 **caspase-3/β-actin (fold) in (c) FaDu and (d) SAS. We used β-actin as the reference. All data**  
9 **are presented as means ± SEM, n = 3. \*p < 0.05. \*\*p < 0.01 compared to control (Ctrl).**

10  
11  
12  
13  
14  
15  
16  
17  
18  
19  
20  
21  
22  
23

## 24 Supplementary figure 2

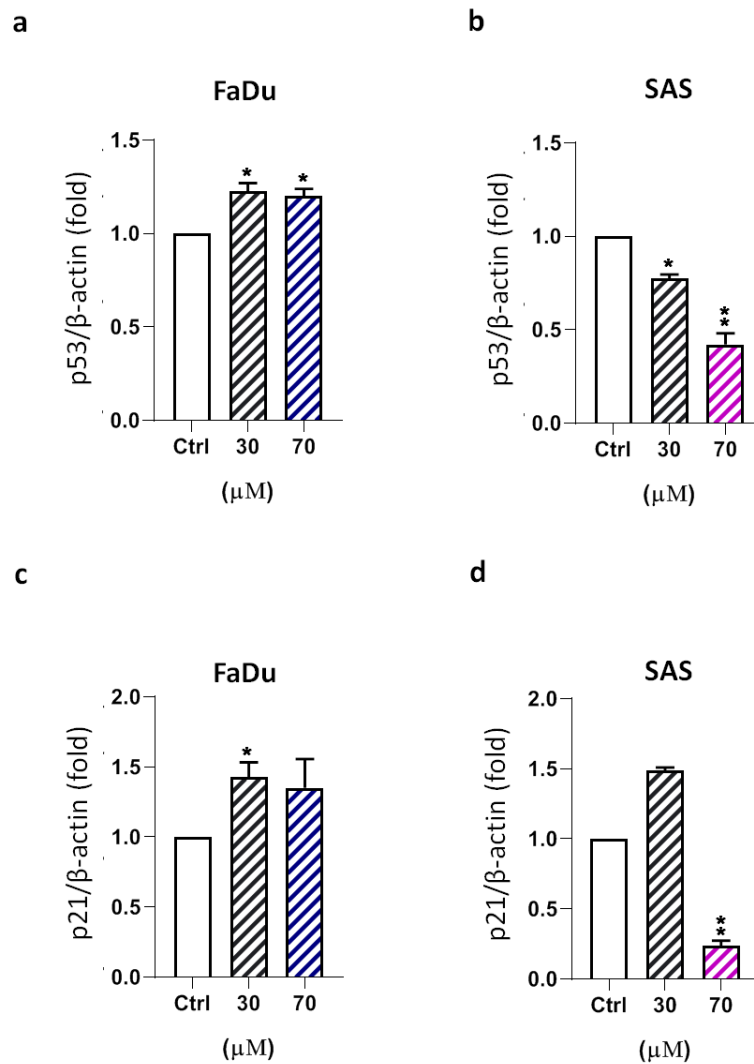

25

26

27 **Supplementary Fig. 2** Quantification of Western blots represented in Figure 3B. Triplicates

28 of the experiments shown in Figure 2C were quantified using densitometry (GraphPad

29 Prism8 software). **Densitometric analysis of all samples normalized against the level of total**30 **protein. The relative expression of p53 and β-actin are presented as p53/β-actin (fold) in (a)**31 **FaDu and (b) SAS, and p21 and β-actin are presented as p21/β-actin (fold) in (c) FaDu and (d)**32 **SAS. We used β-actin as the reference. All data are presented as means ± SEM, n = 3. \*p <**33 **0.05. \*\*p < 0.01 compared to control (Ctrl).**

34

35

36

37

38

39

40

41

42

43

44

## 45 Supplementary figure 3

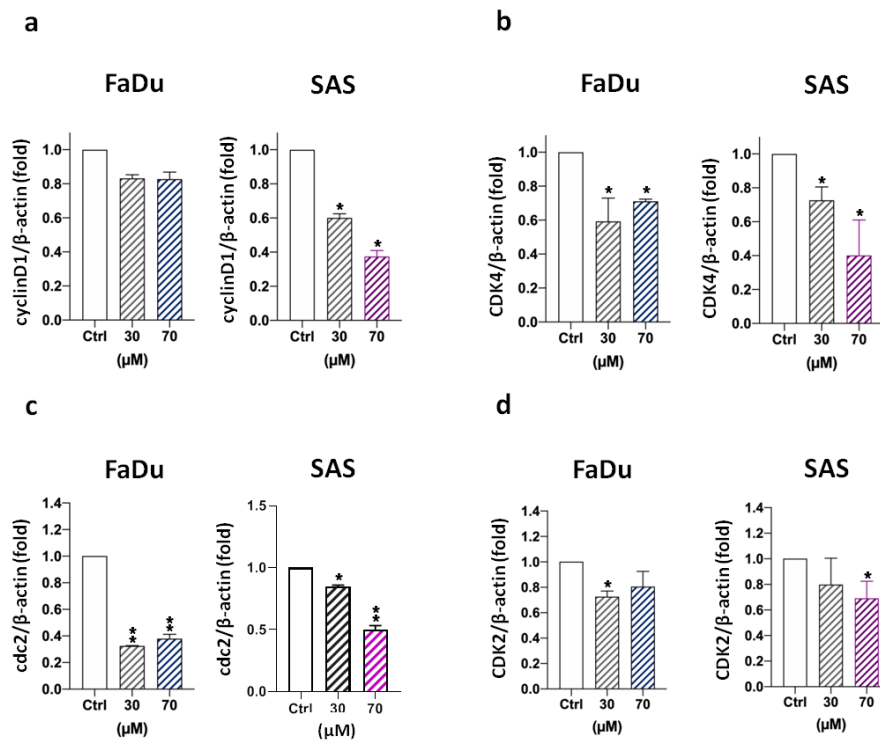

46  
 47 **Supplementary Fig. 3** Quantification of Western blots represented in Figure 3C. Triplicates  
 48 of the experiments shown in Figure 2C were quantified using densitometry (GraphPad  
 49 Prism8 software). **Densitometric analysis of all samples normalized against the level of total**  
 50 **protein. The relative expression of cyclin D1 and  $\beta$ -actin is presented as cyclin D1/ $\beta$ -actin**  
 51 **(fold) in (a) FaDu and SAS, and that of CDK4 and  $\beta$ -actin is presented as CDK4/ $\beta$ -actin**  
 52 **in (b) FaDu and SAS. Densitometric analysis of all samples normalized against the level of**  
 53 **total protein. The relative expression of cdc2 and  $\beta$ -actin is presented as cdc2/ $\beta$ -actin (fold) in**  
 54 **(c) FaDu and SAS, and that of CDK2 and  $\beta$ -actin is presented as CDK2/ $\beta$ -actin (fold) in**  
 55 **(d) FaDu and SAS. We used  $\beta$ -actin as the reference. All data are presented as means  $\pm$  SEM, n =**  
 56 **3. \*p < 0.05. \*\*p < 0.01 compared to control (Ctrl).**

57  
 58  
 59  
 60  
 61  
 62  
 63  
 64  
 65  
 66  
 67  
 68  
 69  
 70  
 71  
 72  
 73

## 74 Supplementary figure 4

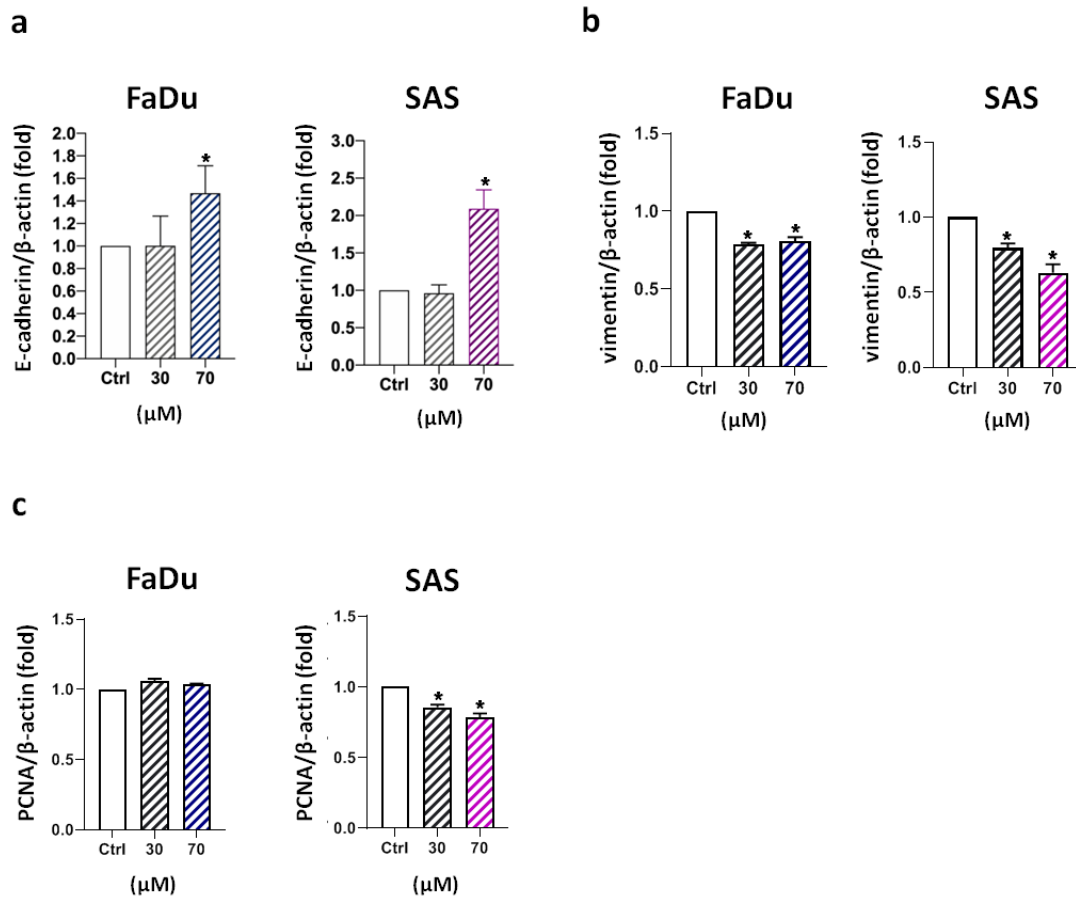

75  
 76 **Supplementary Fig. 4** Quantification of Western blots represented in Figure 4C. Triplicates  
 77 of the experiments shown in Figure 2C were quantified using densitometry (GraphPad  
 78 Prism8 software). **Densitometric analysis of all samples normalized against the level of total**  
 79 **protein. The relative expression of E-cadherin and β-actin is presented as E-cadherin/β-actin**  
 80 **(fold) in (a) FaDu and SAS, and that of vimentin and β-actin is presented as vimentin/β-actin**  
 81 **(fold) in (b) FaDu and SAS. Densitometric analysis of all samples normalized against the**  
 82 **level of total protein. The relative expression of PCNA and β-actin is presented as**  
 83 **PCNA/β-actin (fold) in (c) FaDu and SAS. All data are presented as means ± SEM, n = 3. \*p**  
 84 **< 0.05 compared to control (Ctrl).**

85  
 86  
 87  
 88

89 Supplementary figure 5  
90

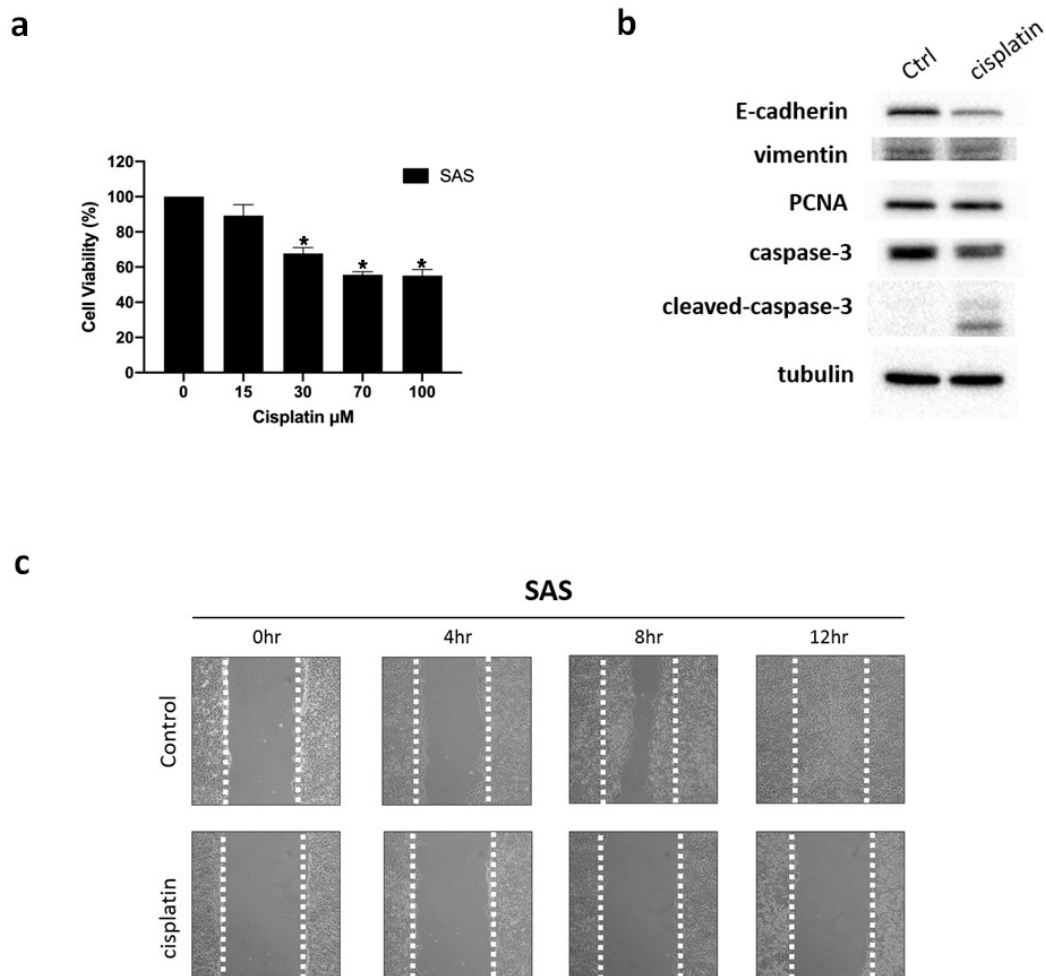

91 **Supplementary Fig. 5** Effect of cisplatin on cell viability, EMT, apoptosis, and migration. (a)  
 92 After the incubation time course, cell viability was determined by using the MTT assay. Data  
 93 are presented as means  $\pm$  SEM,  $n = 3$ . \* $p < 0.05$  compared to control (Ctrl, 0  $\mu\text{M}$ ). (b) The  
 94 expression of E-cadherin, vimentin, PCNA, caspase-3, and cleaved-caspase-3 was analyzed  
 95 by western blotting in cisplatin-treated cells (43.8  $\mu\text{M}$ ) or control (Ctrl, 0  $\mu\text{M}$ ). (c) Migration  
 96 was assessed following mechanical wound healing. Cell migration was evaluated at 12 h after  
 97 treatment with 43.8  $\mu\text{M}$  cisplatin.

98  
99  
100  
101

102 Supplementary figure 6

103

104 **Supplementary Fig. 6** Chrysophanol inhibits cell migration in a lower concentration.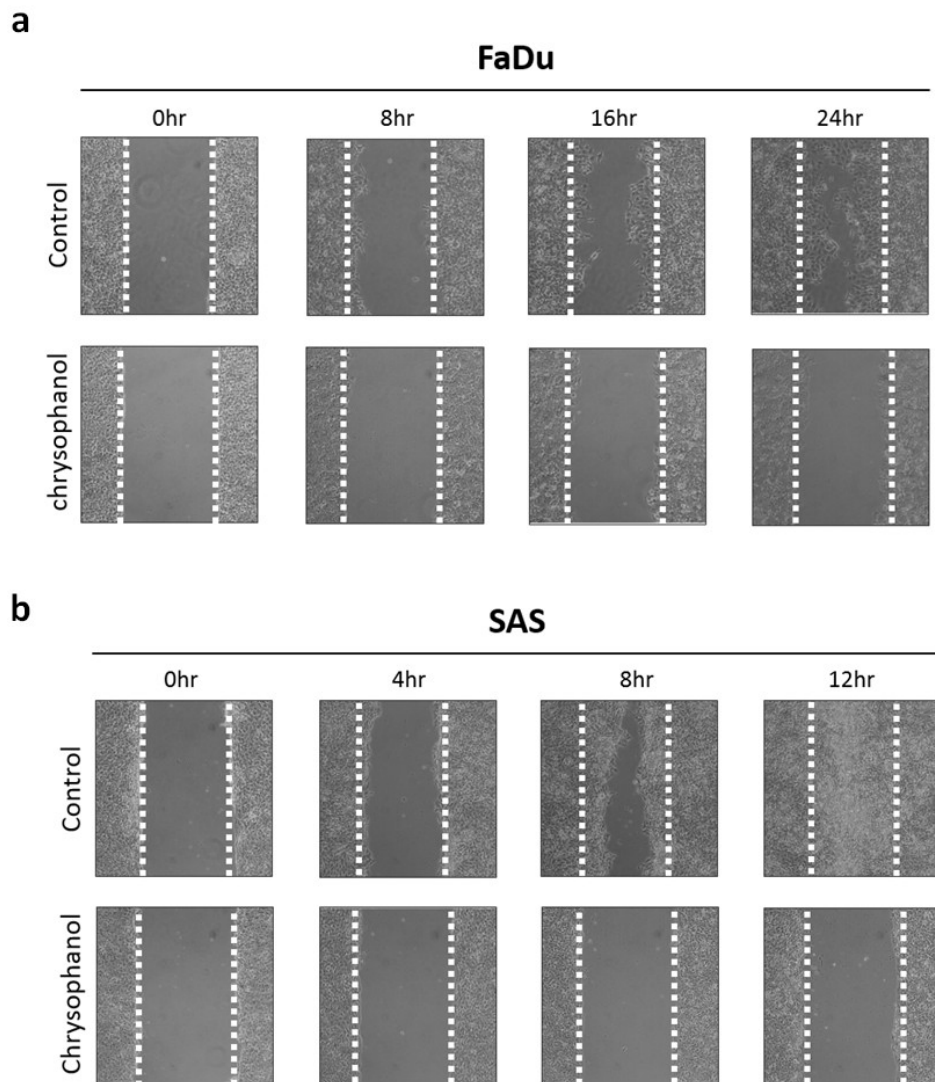

105 Migration was assessed following mechanical wound healing in FaDu (a) and SAS (b). Cell  
106 migration was evaluated at 12 h or 24h after treatment with 10  $\mu$ M of chrysophanol or not  
107 (Control).

108

109

110

111

112

113

114

115

116

117

118

119

120 Supplementary figure 7

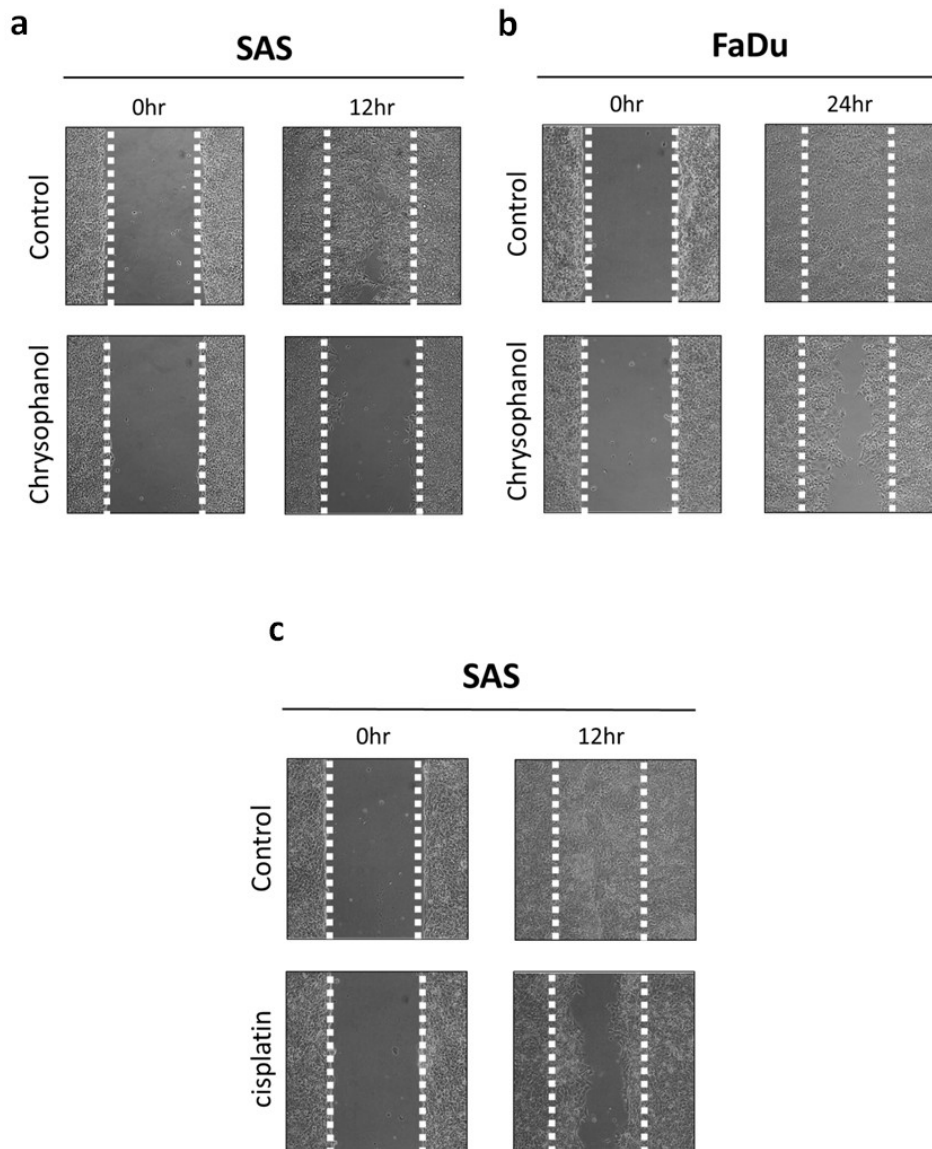

121 **Supplementary Fig. 7** Chrysophanol inhibits cell migration in a lower concentration than  
 122 IC<sub>50</sub>. Migration was assessed following mechanical wound healing in FaDu (a) and SAS  
 123 (b-c). Cell migration was evaluated at 12 h or 24h after treatment with 8  $\mu$ M of  
 124 chrysophanol (a-b) or 20  $\mu$ M of cisplatin (c). Control indicated in absence of chrysophanol or  
 125 cisplatin.

126  
 127  
 128  
 129  
 130  
 131
